# Supplementary material for: In-plane enhanced epitaxy for step-flow AlN yielding a high-performance vacuum-ultraviolet photovoltaic detector
Source: Royal Society of Chemistry journal article supplement (doi:10.1039/c9ce01852b), 2019-12-18
Supplement: c9ce01852b1.pdf [file c9ce01852b1.pdf]

Electronic Supplementary Material (ESI) for CrystEngComm.

## **In-plane Enhanced Epitaxy for Step-flow AlN Yielding High-performance Vacuum-Ultraviolet Photovoltaic Detector**

Titao Li, Fei Wang, Richeng Lin, Wentao Xie, Yuqiang Li, Ze Cai, Wei Zheng,\*  
Feng Huang\*

State Key Laboratory of Optoelectronic Materials and Technologies, School of  
Materials, Sun Yat-sen University, Guangzhou, Guangdong 510275, China

### **Corresponding Author**

\*huangfeng@mail.sysu.edu.cn.

\*zhengw37@mail.sysu.edu.cn

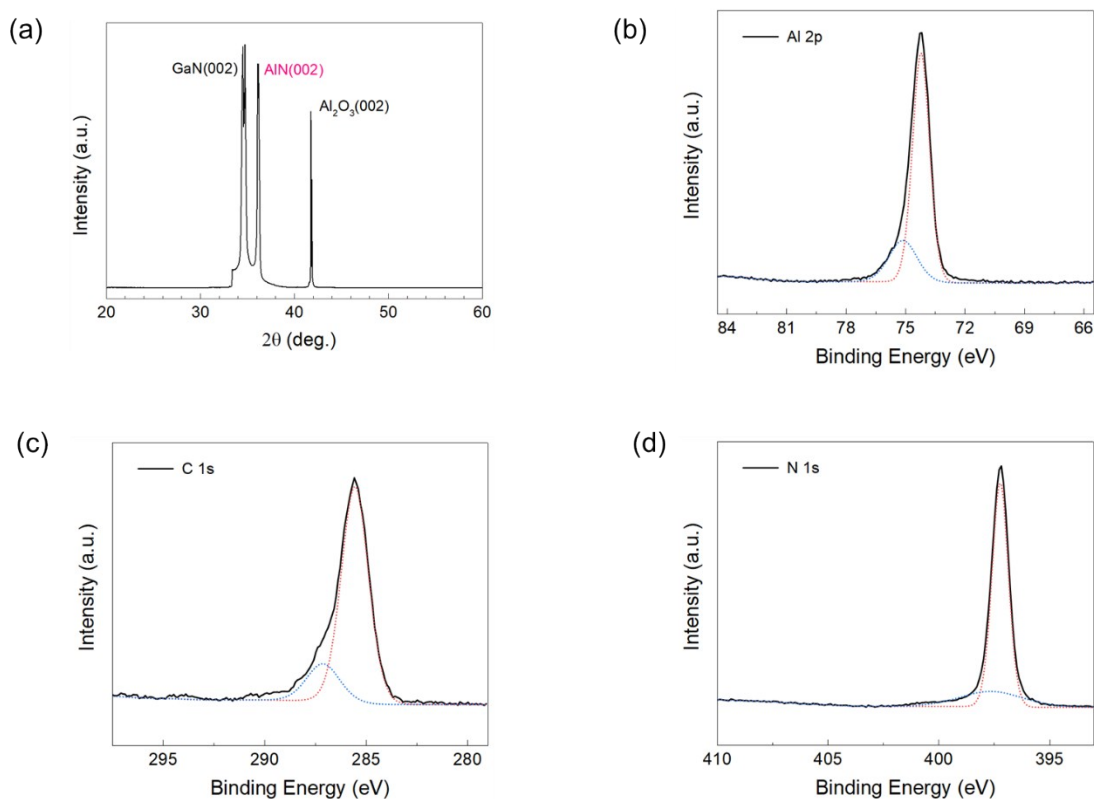

**Figure S1.** (a) X-ray diffraction (XRD) pattern of (002) plane of an AlN film deposited on GaN template, which shows a strong and narrow diffraction peak, indicating a single crystal orientation and a large grain size. (b)-(d) X-ray photoelectron spectroscopy (XPS) of the graphene/AlN heterojunction. The characteristic peaks of (b) C 1s, (c) Al 2p and (d) N 1s are observed, among which the C 1s peaks come from graphene.

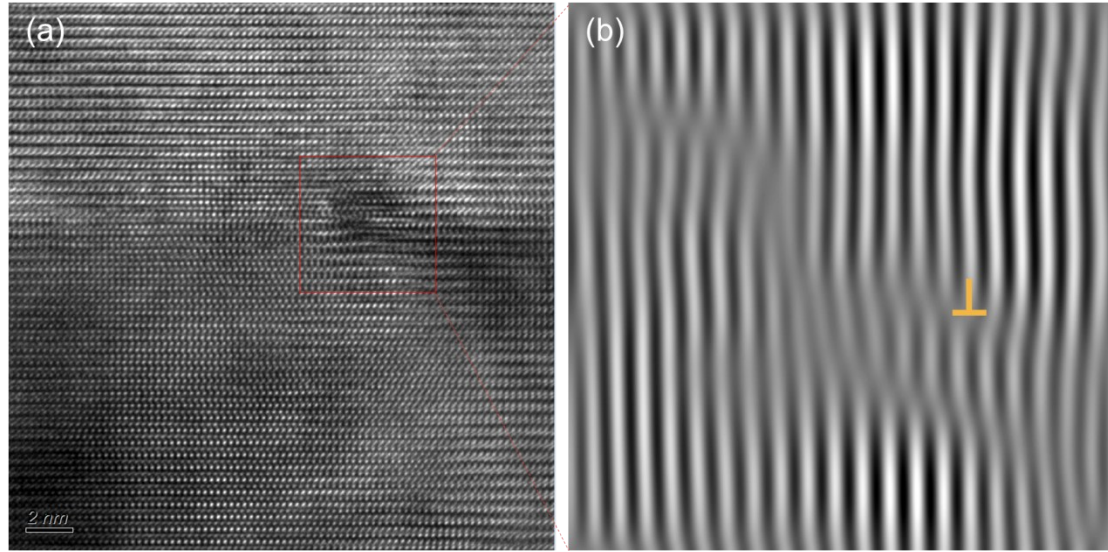

**Figure S2.** (a) Cross-sectional HRTEM image of the AlN/GaN interface. (b) Filtered images from masked fast Fourier transformation of selected area in (a) showing misfit dislocations.

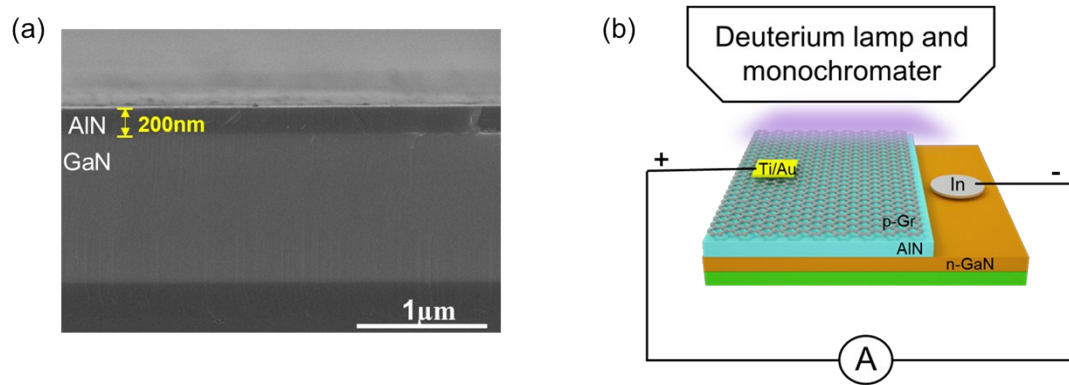

**Figure S3.** (a) Scanning electron microscope (SEM) cross section image of the AlN/n-GaN heterojunction, where the thickness of the AlN single crystalline film is clearly observed to be 200 nm. (b). Schematic diagram of the VUV-selected photo-response of p-Graphene/AlN/n-GaN photovoltaic detector, measured by combining monochromator with deuterium lamp. Wavelength-dependent photoresponsivity ( $R_\lambda$ ) curve is basing on continuous adjustable monochromatic light from deep-UV to VUV.  $R_\lambda$  represents the detection capability of the device, defined as  $R_\lambda = \Delta I / PS$ , where  $\Delta I$  is photocurrent minus dark current,  $P$  is incident optical power density, and  $S$  is light absorption area.

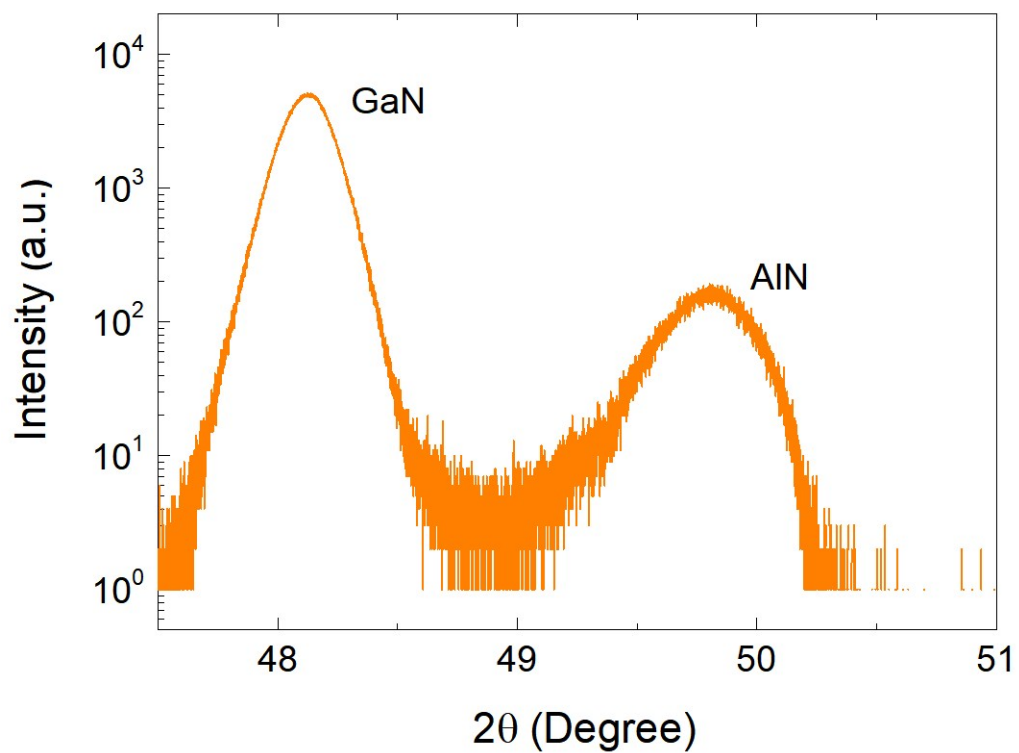

**Figure S4. (a)** HRXRD  $2\theta$ - $\omega$  scan of  $(10\bar{1}2)$  plane of the AlN/GaN heterojunction, indicating a good crystallinity and smoothness of the interface.
